# Supplementary material for: Band engineering of Cu2+ doped In2xZn3(1−x)S3 solid solution with high photocatalytic activity for H2 production under visible light
Source: Royal Society of Chemistry journal article supplement (doi:10.1039/c3cy00089c), 2013-01-01
Supplement: c3cy00089c.pdf [file c3cy00089c.pdf]

## Electronic Supplementary Information

### Band Engineering of $\text{Cu}^{2+}$ Doped $\text{In}_{2x}\text{Zn}_{3(1-x)}\text{S}_3$ Solid Solution with High Photocatalytic Activity for $\text{H}_2$ Production under Visible Light

Fan Li, Guoping Chen, Jianheng Luo, Qingli Huang, Yanhong Luo, Qingbo Meng\* and Dongmei Li\*

*Key Laboratory for Renewable Energy, Chinese academy of Sciences; Beijing Key Laboratory for New Energy Materials and Devices; Beijing National Laboratory for Condense Matter Physics, Institute of Physics, Chinese Academy of Sciences, Beijing, PR China. Fax: +86-10-82649242; Tel: +86-10-82649242; E-mail: qbmeng@iphy.ac.cn; dml@iphy.ac.cn*

#### Scanning electron microscope (SEM) images and Brunauer-Emmett-Teller (BET) measurements

The morphologies of  $\text{In}_{2x}\text{Zn}_{3(1-x)}\text{S}_3$  and  $\text{Cu}(y)\text{-In}_{1.4}\text{Zn}_{0.9}\text{S}_3$  solid solution samples are investigated by SEM images and Brunauer-Emmett-Teller (BET) measurement. Their morphologies of all the samples except ZnS show plate-like hierarchical structures with over  $1\mu\text{m}$  in size (Fig. S1d-h, Fig. S2). BET measurements further prove the plate-like hierarchical structures of the samples. The samples exhibit a typical type IV isotherm with a distinguishable H3-type hysteresis loop (Fig. S3), indicating that the samples are comprised of loose aggregates of plate-like particles.<sup>1, 2</sup>

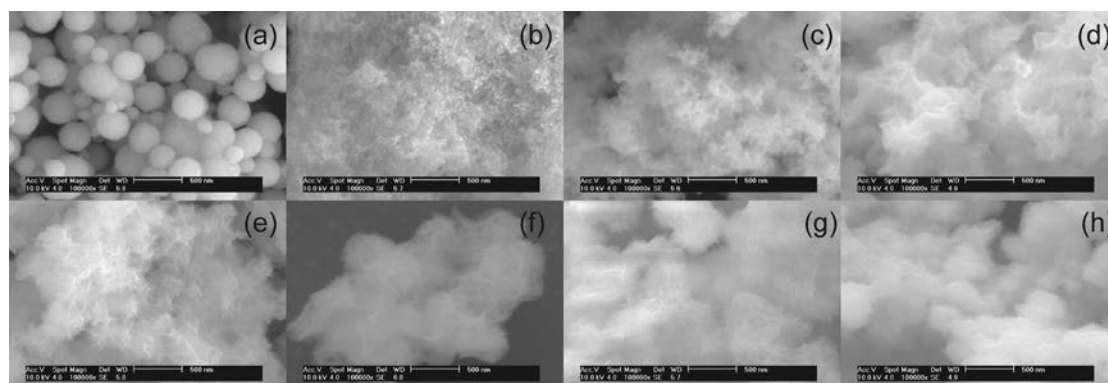

**Fig. S1** SEM images of as-prepared  $\text{In}_{2x}\text{Zn}_{3(1-x)}\text{S}_3$  solid solution samples. The x values of samples are (a) 0; (b) 0.25; (c) 0.55; (d) 0.65; (e) 0.7; (f) 0.75; (g) 0.85; (h) 1. The scale bar is 500nm.

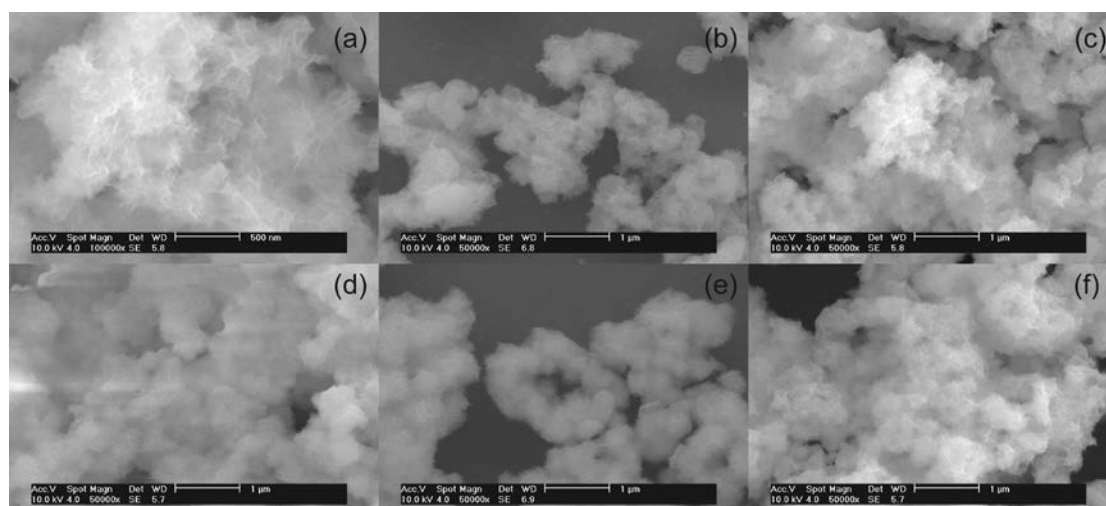

**Fig. S2** SEM images of as-prepared Cu(y)-In<sub>1.4</sub>Zn<sub>0.9</sub>S<sub>3</sub> samples. The y values of samples are (a) 0; (b) 0.67%; (c) 1%; (d) 2%; (e) 2.5%; (f) 4%. The scal bar is 500nm for (a) and 1μm for rest of the images.

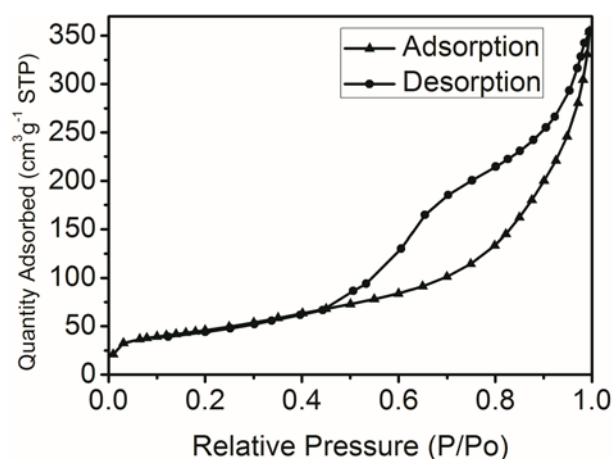

**Fig. S3** Nitrogen adsorption/desorption isotherm of In<sub>1.3</sub>Zn<sub>1.05</sub>S<sub>3</sub> solid solution.

Besides, the X-ray energy dispersive spectroscopy (XEDS) maps of indium, zinc and copper for Cu (4%)/In<sub>1.4</sub>Zn<sub>0.9</sub>S<sub>3</sub> sample were also investigated, as shown in Fig. S4. The maps reveal that the distribution of all the cations is homogeneous, which further proves the formation of the solid solution.

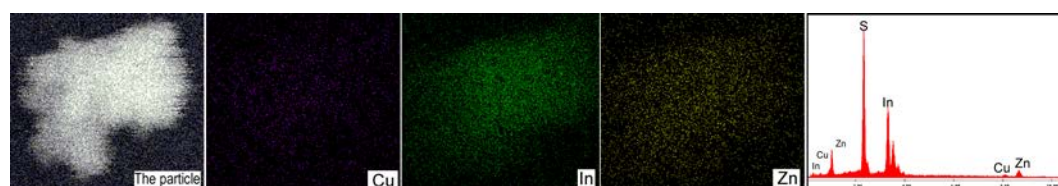

**Fig. S4** XEDS maps for Cu (4%)/In<sub>1.4</sub>Zn<sub>0.9</sub>S<sub>3</sub> sample (Magenta for copper, green for indium and yellow for zinc).

## X-ray photoelectron spectroscopy (XPS) measurement

The XPS data of In3d, Zn2p and S2p of Cu(4%)/In<sub>1.4</sub>Zn<sub>0.9</sub>S<sub>3</sub> sample before and after the photocatalytic H<sub>2</sub> evolution reaction for 15 hours are shown in Fig. S5. The binding energies of In3d<sub>5/2</sub>, In3d<sub>3/2</sub>, Zn2p<sub>3/2</sub>, Zn2p<sub>1/2</sub>, and S2p are 445.3 eV, 452.8 eV, 1021.8 eV, 1044.8 eV and 162.2 eV, respectively. All the results are consistent with that reported in the literatures.<sup>3-6</sup> Besides, the binding energies of all the elements after photocatalytic reaction are almost unchanged with that before the photocatalytic reaction, indicating that the doped solid solutions are quite stable in the presence of the sacrificial reagents and under visible light irradiation.

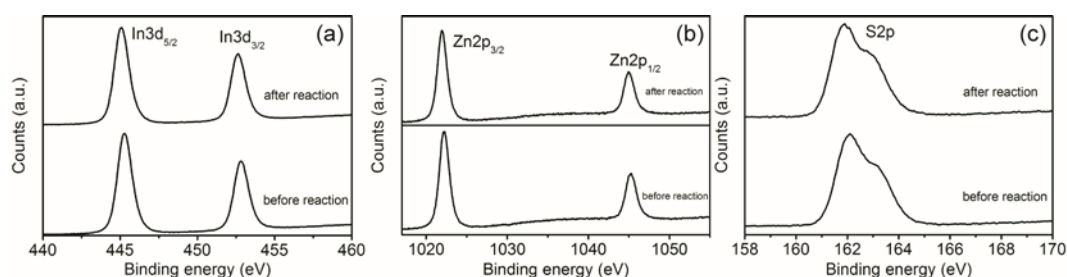

**Fig. S5** XPS data collected from the surface of Cu(4%)/In<sub>1.4</sub>Zn<sub>0.9</sub>S<sub>3</sub> sample before and after the photocatalytic H<sub>2</sub> evolution reaction for 15 hours: (a) partial spectrum of In2p core-level; (b) partial spectrum of Zn2p core-level; (c) partial spectrum of S2p core-level.

## References

- 1 M. Kruk and M. Jaroniec, *Chem. Mater.*, 2001, **13**, 3169.
- 2 K. S. W. Sing, D. H. Everett, R. A. W. Haul, L. Moscou, R. A. Pierotti, J. Rouquerol and T. Siemieniewska, *Pure Appl. Chem.*, 1985, **57**, 603.
- 3 G. E. McGuire, G. K. Schweitzer and T. A. Carlson, *Inorg. Chem.*, 1973, **12**, 2450.
- 4 C. Malatesta, D. Centonze, L. Sabbatini, P. G. Zambonin, L. P. Bicelli and S. Maffi, *J. Mater. Chem.*, 1991, **1**, 259.
- 5 L. S. Dake, D. R. Baer and J. M. Zachara, *Surf. Interface. Anal.*, 1989, **14**, 71.
- 6 E. Agostinelli, C. Battistoni, D. Fiorani, G. Mattogno and M. Nogues, *J. Phys. Chem. Solids*, 1989, **50**, 269.
